# Supplementary material for: In situ measurement of the specific surface area of reduced graphene oxide using time-resolved laser induced incandescence
Source: Research Square preprint supplement (doi:10.21203/rs.3.rs-7673064/v1), 2025-10-08
Supplement: Supplementary file 1 [file 3eb3f89d0d151657c304cff0.docx]

**In situ measurement of the specific surface area of reduced graphene oxide using time-resolved laser induced incandescence**

***Supplemental Material***

Horace I. Looi1, Sarah Jahnkani2, Michael Pope2, and Kyle J. Daun1[[1]](#footnote-1)

1*Department of Mechanical and Mechatronics Engineering, University of Waterloo, Waterloo, ON, Canada*

2*Department of Chemical Engineering, University of Waterloo, Waterloo, ON, Canada*

**Appendix A: TiRe-LII relative calibration**

For this work, the TiRe-LII system was calibrated for relative intensity as opposed to absolute intensity. The calibration procedure followed the approach defined by Mansmann et al. (Mansmann et al., 2019) Each photomultiplier tube (PMT) was calibrated for sensitivity using a calibration light source and for gain across multiple gain levels. The procedure involved using a well-defined light source (SLS201L/M, Thorlabs) to direct light into the detection system. The PMT intensities were then calibrated using the defined spectral light intensity of the light source.

The calibration setup involved directing light produced by the SLS210L/M into a fiber optic cable, which led to an integrating sphere (∅2” IS200-4, Thorlabs) designed to create a uniform light source. The integrating sphere was positioned at probe volume, eliminating the need for further realignment. Photomultiplier tubes are highly sensitive; therefore, care must be taken to prevent damage. As the PMTs were connected to an oscilloscope with a 50 Ω coupling, precautions were taken according to Table A-1 to ensure that the PMT output voltages did not exceed the recommended maximum output voltages.

Table A- PMT maximum output voltage ratings

| **Illumination**  **Time** | **Max Output Voltage**  **(50 Ω coupling)** | **Max Repetition**  **Frequency** |
| --- | --- | --- |
| DC | 5 mV | - |
| 100 µs | 50 mV | 100 Hz |
| 1 µs | 500 mV | 10 Hz |
| 10 ns | 5 V | 1 Hz |

To prevent damage to the PMT, the illumination time is reduced using an optical chopper. The optical chopper is placed between the integrating sphere and collection optics, increasing the maximum repetition frequency and subsequently allowing a higher voltage readout. Additionally, it creates distinct periods for the background signal and the combined background-plus-light signal. This enables the light signal to be determined by subtracting the background signal from the combined signal. Figure A-1 shows a physical image of the calibration setup.

Figure A-: Calibration apparatus.

The calibration factors were determined by establishing a relationship between the induced voltage on a PMT and a known amount of incident irradiation, as well as to examine how this relationship varies across different PMT gains. The irradiance () incident on the *i*th PMT within a wavelength bandwidth Δλ can be computed as follows (Mansmann et al., 2019):

where *E*ref is the intensity of the light source. The light source has a well-defined intensity spectrum, allowing for an easy derivation of this value. A voltage () will be induced on the PMT that can be used to derive an intensity calibration factor (*Di*) as defined by:

where *τi* is the transmission for the *i*th PMT of the neutral density (ND) filter used. Subsequently, *Di* can be normalized against a single PMT to derive a relative intensity calibration factor ().

The voltage applied on the voltage divider circuit of a PMT is controlled by gain controllers. This allows the PMT to measure a wide range of light levels, thereby increasing the dynamic range. However, although the general relationship between voltage gain and the induced PMT signal is well defined, a correction must be applied to derive the exact relationship due to variations in components. This correction can be achieved by determining a gain correction factor (*Gi*),defined as:

where is the gain voltage for an *i*th PMT, is a reference gain voltage at an *i*th PMT, and Ag,*i* is a coefficient that can be found by solving a weighted minimization:

Using the gain correction factor and relative intensity calibration factor, at the *i*th PMT with an applied voltage (), the experimental signal () can be adjusted as follows:

To simplify the description in the remainder of the section, the four PMTs will now be denoted according to Table A-2.

Table A-: PMT naming convention

| PMT Name | PMT 1 | PMT 2 | PMT 3 | PMT 4 |
| --- | --- | --- | --- | --- |
| Spectral bandwidth | 431 to 463 nm | 512 to 577 nm | 600 to 690 nm | 722 to 782 nm |

Due to the lower intensity of the halogen-tungsten lamp, calibration could not be performed across the whole gain range (0 to 1000 gain). Instead, it was conducted from 650 to 900 in increments of 25 gain for PMT 1 and PMT 2, while for PMT 3 and PMT4, calibration was performed from 500 to 750 in increments of 25. The change in measured voltage as a function of gain for PMT1 is shown in Figure A-3. The derived *Ai* and , normalized by PMT1, for each PMT is shown in Table A-3.

Figure A-: Measured voltage vs gain for PMT 1 – Halogen-Tungsten lamp.

Table A-: Calibration constants derived at each PMT – Halogen-Tungsten lamp

| PMTS | PMT1 | PMT2 | PMT3 | PMT4 |
| --- | --- | --- | --- | --- |
| *Ai* | 8.5492 | 6.8132 | 6.9645 | 7.2768 |
|  | 1 | 6.2665 | 7.2036 | 5.1968 |

The calibration constant and *Gi*, determined based on the gain voltages used in the study, can be used to modify the intensity signals before fitting to find the pyrometric temperature.

**Appendix B: Data processing and noise removal**

Theincandescence data is generated by averaging over 400 shots. These curves are contaminated with both q-switch noise, visible as a “ringing feature” near the peak signal, as well as photonic shot noise, which becomes more prominent at later cooling times. Noise affected all channels but was particularly prominent on the 645 nm trace. The q-switch noise may be removed partially by subtracting signals made without an aerosol present in the probe volume, but some ringing artifacts remain. Accordingly, the signals were then conditioned using additional median filtering and locally estimated scatterplot (LOESS) smoothing in the MATLAB® environment. Figure B.1shows the original and conditioned incandescence traces obtained from the 900°C reduction temperature, which are representative of the other traces. Figures B2 and B3 show the pyrometric temperature decay curves obtained using the unprocessed and processed incandescence signals.

Figure B.1: Raw (calibrated) and processed absolute intensity curves for the 900 °C reduction temperature. (a) 447 nm; (b) 545 nm; (c) 645 nm; (d) 747 nm.

Figure B-2: Pyrometric temperature versus time for five reduction temperatures, calculated using unprocessed spectral incandescence data.

Figure B-3: Pyrometric temperature versus time for five reduction temperatures, calculated using spectral incandescence data after median filtering and LOESS smoothing.

1. Corresponding author, kjdaun@uwaterloo.ca [↑](#footnote-ref-1)
